# Supplementary material for: Simultaneous Hydrolysis of Ellagitannins and Extraction of Ellagic Acid from Defatted Raspberry Seeds Using Natural Deep Eutectic Solvents (NADES)
Source: MDPI journal article supplement (doi:10.3390/antiox11020254), 2022-01-28
Supplement: s1 [file s1]

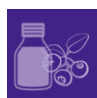

## Supplementary material

Simultaneous hydrolysis of ellagitannins and extraction of ellagic acid from defatted raspberry seeds using Natural Deep Eutectic Solvents (NADES)

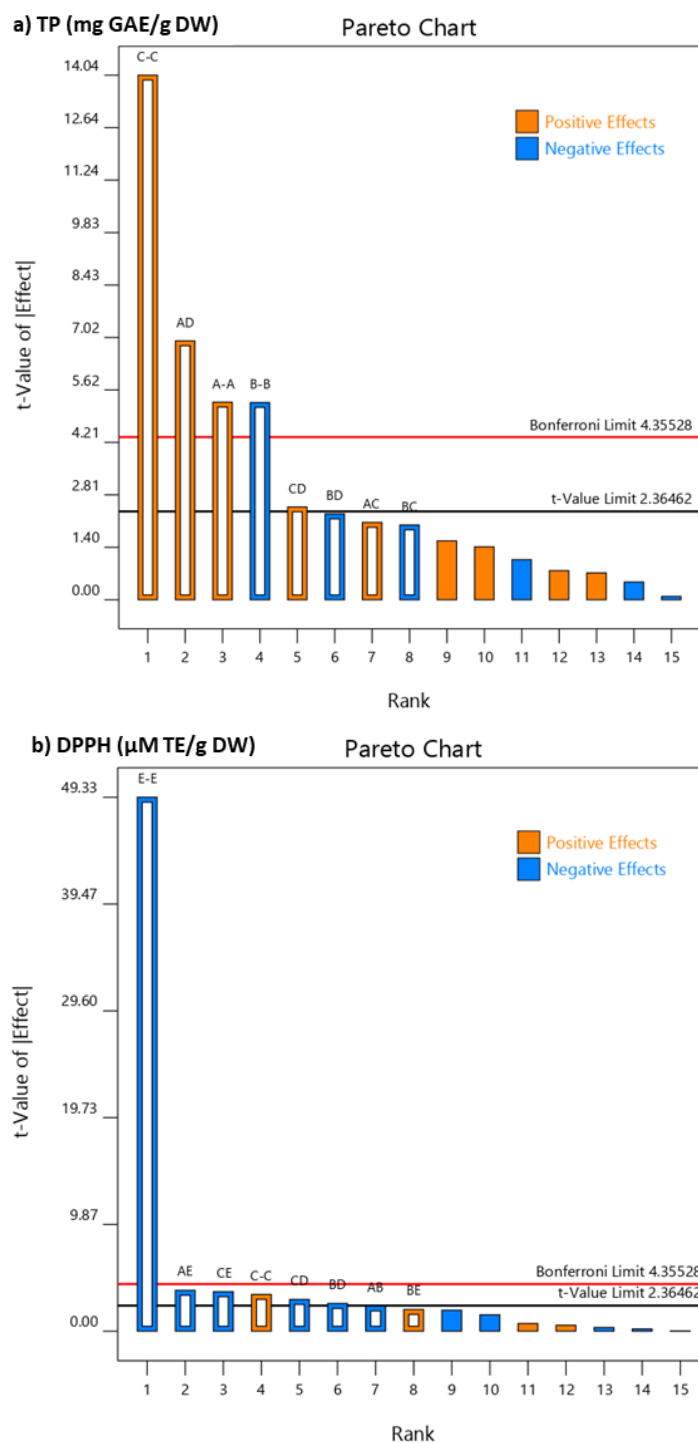

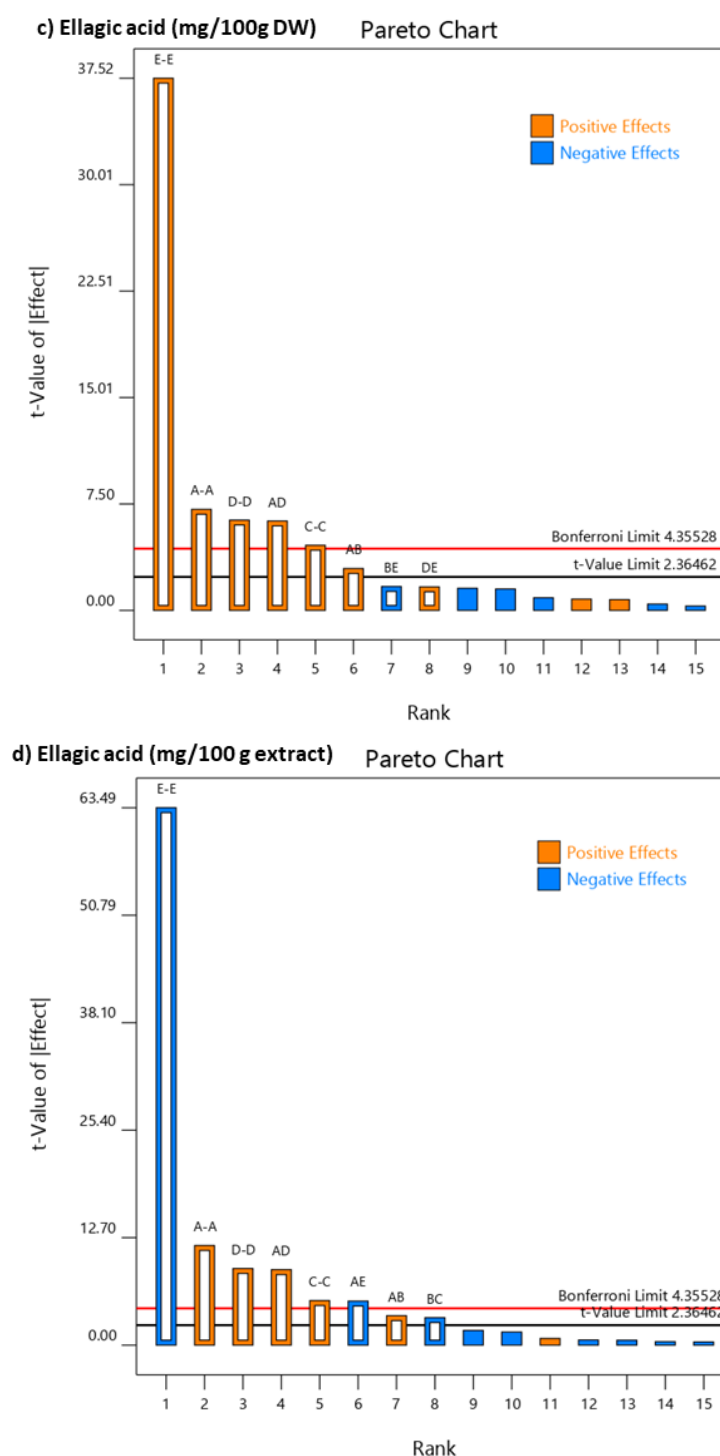

**Figure S1.** Pareto chart with effects of process parameters on ellagic acid recovery from defatted raspberry seeds. A-A, B-B, C-C, D-D, E-E stand for individual contribution of temperature, molar ratio, water content, time and NADES/plant ratio on process, respectively. AE stands for simultaneous contribution or interaction effect of temperature and NADES/plant ratio on process and so forth.

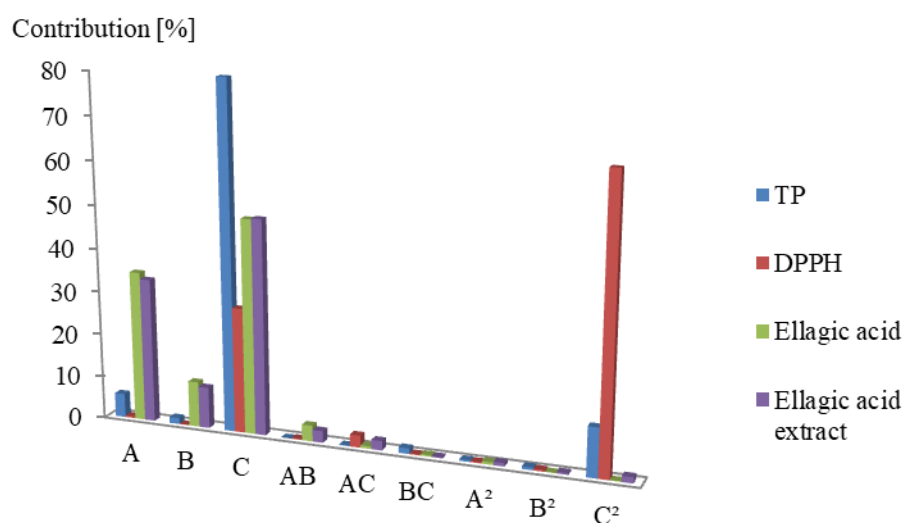

**Figure S2.** The contribution of temperature (A), time (B), NADES/plant ratio (C) and their interactions on total polyphenols (TP) content, antioxidant activity (DPPH), and ellagic acid content expressed on defatted raspberry seeds (EA) and NADES extract (EAE).

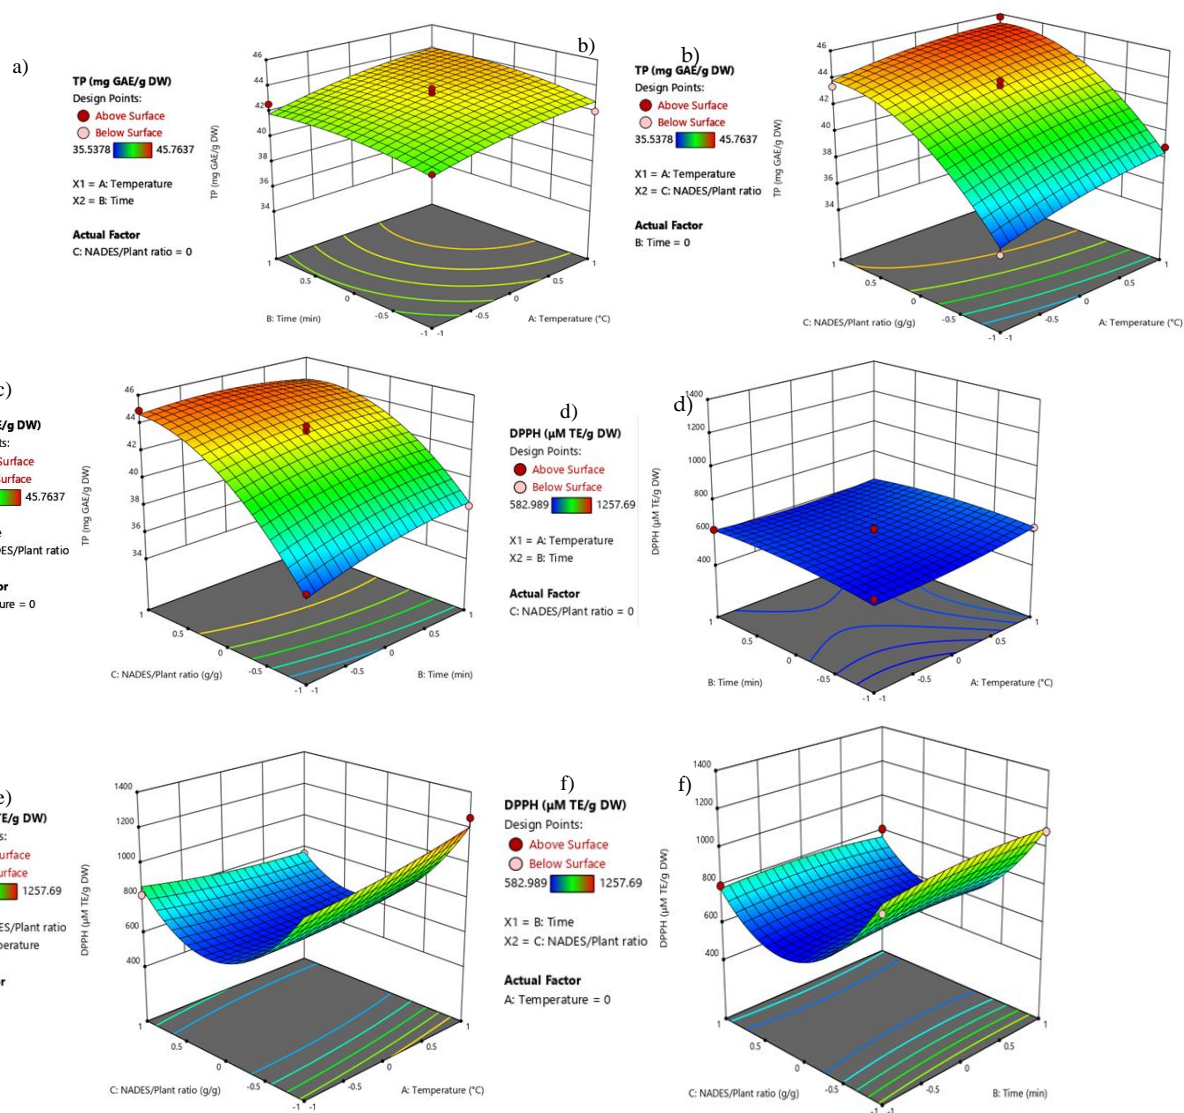

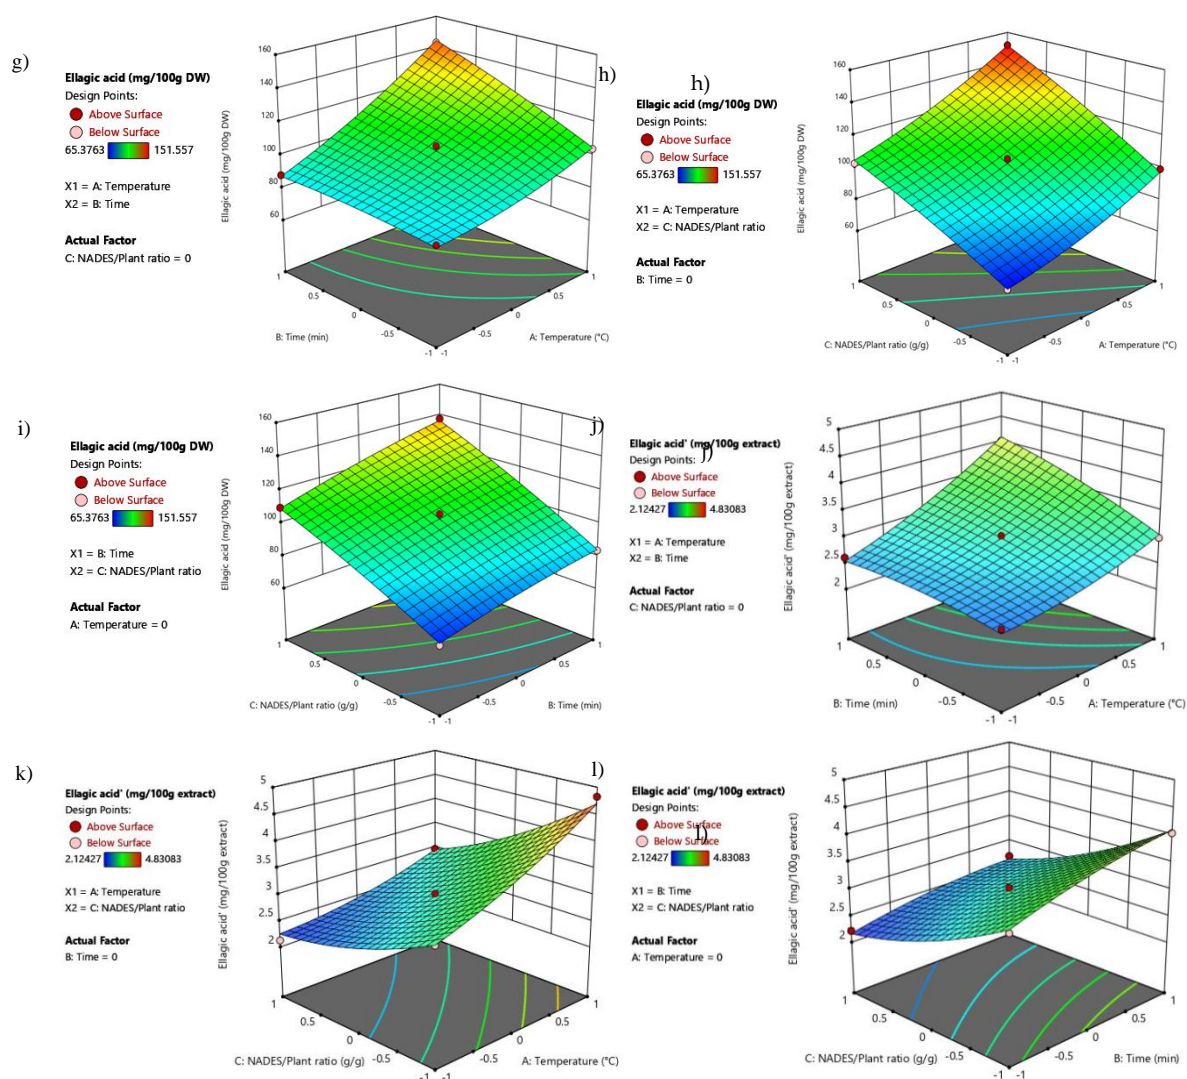

**Figure S3.** Response surface 3D plots displaying mutual impact of : a) temperature (T) and time (t); b) T and NADES/plant ratio (N/P); c) t and N/P impact on total polyphenol content; d) T and t; e) T and N/P; f) t and N/P effect on antioxidant activity; g) T and t; h) T and N/P; i) t and N/P influence on ellagic acid (EA) expressed on raspberry seeds; j) T and t; k) T and N/P; l) t and N/P effect on EA expressed on extract.

**Table S1.** ANOVA of the fitted 2<sup>nd</sup> order polynomial models obtained with response surface methodology and applied for investigated responses.

| Term        | TP     | DPPH     | Ellagic acid | Ellagic acid extract |
|-------------|--------|----------|--------------|----------------------|
| Intercept   |        |          |              |                      |
| a0          | 43.30  | 614.03   | 102.95       | 2.99                 |
| Linear      |        |          |              |                      |
| a1          | 0.96** | 17.75    | 19.58*       | 0.55*                |
| a2          | 0.49   | 7.50     | 10.77*       | 0.30*                |
| a3          | 3.67*  | -151.20* | 23.31*       | -0.67*               |
| Interaction |        |          |              |                      |
| a12         | 0.12   | -18.05   | 9.00*        | 0.22**               |
| a13         | -0.23  | -66.32** | 3.64**       | -0.20**              |
| a23         | -0.66  | -18.63   | 2.85         | -0.07                |
| Quadratic   |        |          |              |                      |
| a11         | -0.38  | 21.65    | 3.74**       | 0.12                 |
| a22         | -0.48  | -25.59   | -1.59        | -0.09                |

|               |         |         |          |         |
|---------------|---------|---------|----------|---------|
| $a_{33}$      | -2.03*  | 336.95* | -1.87    | 0.17**  |
| $R^{2a}$      | 0.9770  | 0.9802  | 0.9967   | 0.9904  |
| $Adj\ R^{2b}$ | 0.9357  | 0.9445  | 0.9906   | 0.9731  |
| $CV^c$        | 1.91    | 6.40    | 2.36     | 3.85    |
| $p_m^d$       | 0.0014* | 0.0010* | <0.0001* | 0.0002* |
| $p_{if}^e$    | 0.3449  | 0.0545  | 0.6004   | 0.0677  |

\* $p < 0.01$ \*\* $0.01 \leq p < 0.05$ <sup>a</sup> Determination coefficient<sup>b</sup> Adjusted determination coefficient<sup>c</sup> Coefficient of variance (%)<sup>d</sup> Significance of model<sup>e</sup> Lack of fit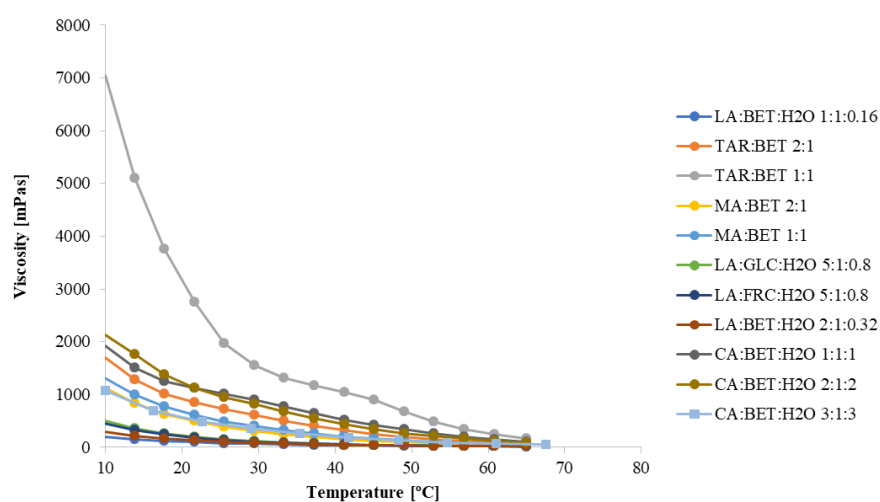

**Figure S4.** Viscosity of NADES in function of temperature. All NADES have 20% w/w of final water content excluding CA:BET:H<sub>2</sub>O 3:1:3 which has 25% w/w of final water content.
